# Supplementary material
Source: publisher figshare collection journal article supplement (https://rs.figshare.com/ndownloader/files/10912580)
Supplement: Supplementary file 1 [file 10912580]

## Sheet: Hoja1
Title: Shyer and larger species show more reduced fear of humans when living in urban environments
Author: Javier delBarco-Trillo
species	family	order	fid.urban	N.urban	fid.rural	N.rural	fid.absolute.change	fid.relative.change	body.mass	reference
Acanthis.flammea	Fringillidae	Passeriformes	6	2	8.25	4	2.25	0.27	13.1	Díaz M, Møller AP, Flensted-Jensen E, Grim T, Ibáñez-Álamo JD, Jokimäki J, Markó G, Tryjanowski P. 2013. The geography of fear: A latitudinal gradient in anti-predator escape distances of birds across Europe. PLoS ONE. 8:e64634.
Acridotheres.tristis	Sturnidae	Passeriformes	4.7	40	26.8	40	22.1	0.82	119.4	McGiffin A, Lill A, Beckman J, Johnstone CP. 2013. Tolerance of human approaches by Common Mynas along an urban–rural gradient. Emu. 113:154-160.
Acrocephalus.scirpaceus	Acrocephalidae	Passeriformes	3.16	2	6.59	6	3.43	0.52	11.8	Díaz M, Møller AP, Flensted-Jensen E, Grim T, Ibáñez-Álamo JD, Jokimäki J, Markó G, Tryjanowski P. 2013. The geography of fear: A latitudinal gradient in anti-predator escape distances of birds across Europe. PLoS ONE. 8:e64634.
Aegithalos.caudatus	Aegithalidae	Passeriformes	4.56	19	6.58952	21	2.03	0.31	8.8	Díaz M, Møller AP, Flensted-Jensen E, Grim T, Ibáñez-Álamo JD, Jokimäki J, Markó G, Tryjanowski P. 2013. The geography of fear: A latitudinal gradient in anti-predator escape distances of birds across Europe. PLoS ONE. 8:e64634.
Agelaioides.badius	Icteridae	Passeriformes	6.44	8	8.09	16	1.65	0.2	43	Carrete M, Tella JL. 2011. Inter-individual variability in fear of humans and relative brain size of the species are related to contemporary urban invasion in birds. PLoS ONE. 6:e18859
Anas.platyrhynchos	Anatidae	Anseriformes	3.99	135	17.6061	79	13.62	0.77	1119	Díaz M, Møller AP, Flensted-Jensen E, Grim T, Ibáñez-Álamo JD, Jokimäki J, Markó G, Tryjanowski P. 2013. The geography of fear: A latitudinal gradient in anti-predator escape distances of birds across Europe. PLoS ONE. 8:e64634.
Anser.anser	Anatidae	Anseriformes	12.42	24	180	4	167.58	0.93	3464.5	Díaz M, Møller AP, Flensted-Jensen E, Grim T, Ibáñez-Álamo JD, Jokimäki J, Markó G, Tryjanowski P. 2013. The geography of fear: A latitudinal gradient in anti-predator escape distances of birds across Europe. PLoS ONE. 8:e64634.
Anthus.lutescens	Motacillidae	Passeriformes	9.37	6	8.88	10	-0.49	-0.06	12.6	Piratelli AJ, Favoretto GR, de Almeida Maximiano MF. 2015. Factors affecting escape distance in birds. Zoologia. 32:438-444.
Anthus.spinoletta	Motacillidae	Passeriformes	3.05	18	7.5	6	4.45	0.59	21.45	Møller AP. 2010. Interspecific variation in fear responses predicts urbanization in birds. Behav Ecol. 21:365-371.
Ardea.alba	Ardeidae	Pelecaniformes	5.44	19	20.4	4	14.96	0.73	873.5	Piratelli AJ, Favoretto GR, de Almeida Maximiano MF. 2015. Factors affecting escape distance in birds. Zoologia. 32:438-444.
Ardea.cinerea	Ardeidae	Pelecaniformes	20.55	11	55.0024	17	34.45	0.63	1433	Díaz M, Møller AP, Flensted-Jensen E, Grim T, Ibáñez-Álamo JD, Jokimäki J, Markó G, Tryjanowski P. 2013. The geography of fear: A latitudinal gradient in anti-predator escape distances of birds across Europe. PLoS ONE. 8:e64634.
Athene.cunicularia	Strigidae	Strigiformes	18	235	51	103	33	0.65	155	Carrete M, Tella JL. 2013. High individual consistency in fear of humans throughout the adult lifespan of rural and urban burrowing owls. Scientific Reports. 3:3524.
Bubulcus.ibis	Ardeidae	Pelecaniformes	10.5	2	22	14	11.5	0.52	338	Carrete M, Tella JL. 2011. Inter-individual variability in fear of humans and relative brain size of the species are related to contemporary urban invasion in birds. PLoS ONE. 6:e18859
Cardinalis.cardinalis	Cardinalidae	Passeriformes	8.8	17	12.57	16	3.77	0.3	44.8	Battle KE, Foltz SL, Moore IT. 2016. Predictors of flight behavior in rural and urban songbirds. Wilson Journal of Ornithology. 128:510-519.
Carduelis.carduelis	Fringillidae	Passeriformes	9.43	86	17.0527	149	7.62	0.45	15.6	Díaz M, Møller AP, Flensted-Jensen E, Grim T, Ibáñez-Álamo JD, Jokimäki J, Markó G, Tryjanowski P. 2013. The geography of fear: A latitudinal gradient in anti-predator escape distances of birds across Europe. PLoS ONE. 8:e64634.
Certhia.brachydactyla	Certhiidae	Passeriformes	7.18	13	9.35889	9	2.18	0.23	9.2	Díaz M, Møller AP, Flensted-Jensen E, Grim T, Ibáñez-Álamo JD, Jokimäki J, Markó G, Tryjanowski P. 2013. The geography of fear: A latitudinal gradient in anti-predator escape distances of birds across Europe. PLoS ONE. 8:e64634.
Chloris.chloris	Fringillidae	Passeriformes	10.24	187	12.8742	126	2.63	0.2	27.7	Díaz M, Møller AP, Flensted-Jensen E, Grim T, Ibáñez-Álamo JD, Jokimäki J, Markó G, Tryjanowski P. 2013. The geography of fear: A latitudinal gradient in anti-predator escape distances of birds across Europe. PLoS ONE. 8:e64634.
Chroicocephalus.ridibundus	Laridae	Charadriiformes	14.0397	76	22.8365	17	8.8	0.39	280.5	Díaz M, Møller AP, Flensted-Jensen E, Grim T, Ibáñez-Álamo JD, Jokimäki J, Markó G, Tryjanowski P. 2013. The geography of fear: A latitudinal gradient in anti-predator escape distances of birds across Europe. PLoS ONE. 8:e64634.
Coccothraustes.coccothraustes	Fringillidae	Passeriformes	11.31	7	22.2625	12	10.95	0.49	54.7	Díaz M, Møller AP, Flensted-Jensen E, Grim T, Ibáñez-Álamo JD, Jokimäki J, Markó G, Tryjanowski P. 2013. The geography of fear: A latitudinal gradient in anti-predator escape distances of birds across Europe. PLoS ONE. 8:e64634.
Coereba.flaveola	Thraupidae	Passeriformes	4.18733	>4	5.34435	>4	1.16	0.22	10.3	Ducatez S, Audet JN, Rodriguez JR, Kayello L, Lefebvre L. 2017. Innovativeness and the effects of urbanization on risk-taking behaviors in wild Barbados birds. Anim Cogn. 20:33-42.
Colaptes.campestris	Picidae	Piciformes	7.16	16	17.92	46	10.76	0.6	165	Carrete M, Tella JL. 2011. Inter-individual variability in fear of humans and relative brain size of the species are related to contemporary urban invasion in birds. PLoS ONE. 6:e18859
Colaptes.melanochloros	Picidae	Piciformes	7.74	17	13.9	15	6.16	0.44	121	Carrete M, Tella JL. 2011. Inter-individual variability in fear of humans and relative brain size of the species are related to contemporary urban invasion in birds. PLoS ONE. 6:e18859
Columba.livia	Columbidae	Columbiformes	4.555	405	71.9131	160	67.36	0.94	261	Díaz M, Møller AP, Flensted-Jensen E, Grim T, Ibáñez-Álamo JD, Jokimäki J, Markó G, Tryjanowski P. 2013. The geography of fear: A latitudinal gradient in anti-predator escape distances of birds across Europe. PLoS ONE. 8:e64634.
Columba.oenas	Columbidae	Columbiformes	6.97	2	16.9233	6	9.95	0.59	494.5	Díaz M, Møller AP, Flensted-Jensen E, Grim T, Ibáñez-Álamo JD, Jokimäki J, Markó G, Tryjanowski P. 2013. The geography of fear: A latitudinal gradient in anti-predator escape distances of birds across Europe. PLoS ONE. 8:e64634.
Columba.palumbus	Columbidae	Columbiformes	8.45	246	51.5283	346	43.08	0.84	494.5	Díaz M, Møller AP, Flensted-Jensen E, Grim T, Ibáñez-Álamo JD, Jokimäki J, Markó G, Tryjanowski P. 2013. The geography of fear: A latitudinal gradient in anti-predator escape distances of birds across Europe. PLoS ONE. 8:e64634.
Columbina.passerina	Columbidae	Columbiformes	7.66	>5	11.5152	>5	3.86	0.33	33	Ducatez S, Audet JN, Rodriguez JR, Kayello L, Lefebvre L. 2017. Innovativeness and the effects of urbanization on risk-taking behaviors in wild Barbados birds. Anim Cogn. 20:33-42.
Columbina.picui	Columbidae	Columbiformes	3.64	56	14.34	44	10.7	0.75	46	Carrete M, Tella JL. 2011. Inter-individual variability in fear of humans and relative brain size of the species are related to contemporary urban invasion in birds. PLoS ONE. 6:e18859
Corvus.monedula	Corvidae	Passeriformes	10.04	76	56.8195	91	46.78	0.82	249	Díaz M, Møller AP, Flensted-Jensen E, Grim T, Ibáñez-Álamo JD, Jokimäki J, Markó G, Tryjanowski P. 2013. The geography of fear: A latitudinal gradient in anti-predator escape distances of birds across Europe. PLoS ONE. 8:e64634.
Corvus.cornix	Corvidae	Passeriformes	11.675	116	35.2798	99	23.6	0.67	544.5	Díaz M, Møller AP, Flensted-Jensen E, Grim T, Ibáñez-Álamo JD, Jokimäki J, Markó G, Tryjanowski P. 2013. The geography of fear: A latitudinal gradient in anti-predator escape distances of birds across Europe. PLoS ONE. 8:e64634.
Corvus.corone	Corvidae	Passeriformes	16.99	29	31.71	72	14.72	0.46	544.5	Møller AP. 2010. Interspecific variation in fear responses predicts urbanization in birds. Behav Ecol. 21:365-371.
Corvus.frugilegus	Corvidae	Passeriformes	16.89	29	46.53	99	29.64	0.64	453.5	Díaz M, Møller AP, Flensted-Jensen E, Grim T, Ibáñez-Álamo JD, Jokimäki J, Markó G, Tryjanowski P. 2013. The geography of fear: A latitudinal gradient in anti-predator escape distances of birds across Europe. PLoS ONE. 8:e64634.
Corvus.mellori	Corvidae	Passeriformes	13.6	87	77.1	86	63.5	0.82	560	Vines A, Lill A. 2016. Boldness and urban dwelling in little ravens. Wildlife Research. 42:590-597.
Cracticus.tibicen	Artamidae	Passeriformes	8.9	20	58.7	43	49.8	0.85	360	Rollinson DJ, Jones DN. 2006. Tolerance of Australian magpies Gymnorhina tibicen towards humans: A comparison along an urban gradient. Australian Field Ornithology. 23:29-35.
Cuculus.canorus	Cuculidae	Cuculiformes	33.5	2	21.72	13	-11.78	-0.54	120.5	Díaz M, Møller AP, Flensted-Jensen E, Grim T, Ibáñez-Álamo JD, Jokimäki J, Markó G, Tryjanowski P. 2013. The geography of fear: A latitudinal gradient in anti-predator escape distances of birds across Europe. PLoS ONE. 8:e64634.
Cyanistes.caeruleus	Paridae	Passeriformes	4.74891	128	9.43134	127	4.68	0.5	11.8	Díaz M, Møller AP, Flensted-Jensen E, Grim T, Ibáñez-Álamo JD, Jokimäki J, Markó G, Tryjanowski P. 2013. The geography of fear: A latitudinal gradient in anti-predator escape distances of birds across Europe. PLoS ONE. 8:e64634.
Cyanoliseus.patagonus	Psittacidae	Psittaciformes	7.42	12	31.63	38	24.21	0.77	273	Carrete M, Tella JL. 2011. Inter-individual variability in fear of humans and relative brain size of the species are related to contemporary urban invasion in birds. PLoS ONE. 6:e18859
Cygnus.atratus	Anatidae	Anseriformes	13	>5	96	>5	83	0.86	6350	van Dongen WFD, Robinson RW, Weston MA, Mulder RA, Guay P-J. 2015. Variation at the DRD4 locus is associated with wariness and local site selection in urban black swans. BMC Evol Biol. 15:253.
Dendrocopos.major	Picidae	Piciformes	8.89	14	18.6384	19	9.75	0.52	89.7	Díaz M, Møller AP, Flensted-Jensen E, Grim T, Ibáñez-Álamo JD, Jokimäki J, Markó G, Tryjanowski P. 2013. The geography of fear: A latitudinal gradient in anti-predator escape distances of birds across Europe. PLoS ONE. 8:e64634.
Elanus.leucurus	Accipitridae	Accipitriformes	25	2	36.6	10	11.6	0.32	300	Carrete M, Tella JL. 2011. Inter-individual variability in fear of humans and relative brain size of the species are related to contemporary urban invasion in birds. PLoS ONE. 6:e18859
Emberiza.calandra	Emberizidae	Passeriformes	10.52	2	16.9125	61	6.39	0.38	47.7	Díaz M, Møller AP, Flensted-Jensen E, Grim T, Ibáñez-Álamo JD, Jokimäki J, Markó G, Tryjanowski P. 2013. The geography of fear: A latitudinal gradient in anti-predator escape distances of birds across Europe. PLoS ONE. 8:e64634.
Emberiza.citrinella	Emberizidae	Passeriformes	8.438	5	11.0452	154	2.61	0.24	26.8	Díaz M, Møller AP, Flensted-Jensen E, Grim T, Ibáñez-Álamo JD, Jokimäki J, Markó G, Tryjanowski P. 2013. The geography of fear: A latitudinal gradient in anti-predator escape distances of birds across Europe. PLoS ONE. 8:e64634.
Emberiza.schoeniclus	Emberizidae	Passeriformes	8.48667	3	9.84456	90	1.36	0.14	18.8	Díaz M, Møller AP, Flensted-Jensen E, Grim T, Ibáñez-Álamo JD, Jokimäki J, Markó G, Tryjanowski P. 2013. The geography of fear: A latitudinal gradient in anti-predator escape distances of birds across Europe. PLoS ONE. 8:e64634.
Erithacus.rubecula	Muscicapidae	Passeriformes	5.10315	89	6.92584	89	1.82	0.26	16.4	Díaz M, Møller AP, Flensted-Jensen E, Grim T, Ibáñez-Álamo JD, Jokimäki J, Markó G, Tryjanowski P. 2013. The geography of fear: A latitudinal gradient in anti-predator escape distances of birds across Europe. PLoS ONE. 8:e64634.
Falco.sparverius	Falconidae	Falconiformes	13.25	12	27.84	74	14.59	0.52	115	Carrete M, Tella JL. 2011. Inter-individual variability in fear of humans and relative brain size of the species are related to contemporary urban invasion in birds. PLoS ONE. 6:e18859
Ficedula.hypoleuca	Muscicapidae	Passeriformes	7.16	4	6.50429	7	-0.66	-0.1	14.4	Díaz M, Møller AP, Flensted-Jensen E, Grim T, Ibáñez-Álamo JD, Jokimäki J, Markó G, Tryjanowski P. 2013. The geography of fear: A latitudinal gradient in anti-predator escape distances of birds across Europe. PLoS ONE. 8:e64634.
Fluvicola.nengeta	Tyrannidae	Passeriformes	5.03	17	6.7	14	1.67	0.25	21	Piratelli AJ, Favoretto GR, de Almeida Maximiano MF. 2015. Factors affecting escape distance in birds. Zoologia. 32:438-444.
Fringilla.coelebs	Fringillidae	Passeriformes	5.50416	125	11.9687	205	6.46	0.54	24.2	Díaz M, Møller AP, Flensted-Jensen E, Grim T, Ibáñez-Álamo JD, Jokimäki J, Markó G, Tryjanowski P. 2013. The geography of fear: A latitudinal gradient in anti-predator escape distances of birds across Europe. PLoS ONE. 8:e64634.
Furnarius.rufus	Furnariidae	Passeriformes	3.13	57	12.45	30	9.32	0.75	51	Carrete M, Tella JL. 2011. Inter-individual variability in fear of humans and relative brain size of the species are related to contemporary urban invasion in birds. PLoS ONE. 6:e18859
Galerida.cristata	Alaudidae	Passeriformes	16.01	13	66.609	40	50.6	0.76	44.7	Díaz M, Møller AP, Flensted-Jensen E, Grim T, Ibáñez-Álamo JD, Jokimäki J, Markó G, Tryjanowski P. 2013. The geography of fear: A latitudinal gradient in anti-predator escape distances of birds across Europe. PLoS ONE. 8:e64634.
Gallinula.chloropus	Rallidae	Gruiformes	6.184	35	10.6705	21	4.49	0.42	348.5	Díaz M, Møller AP, Flensted-Jensen E, Grim T, Ibáñez-Álamo JD, Jokimäki J, Markó G, Tryjanowski P. 2013. The geography of fear: A latitudinal gradient in anti-predator escape distances of birds across Europe. PLoS ONE. 8:e64634.
Gallinula.galeata	Rallidae	Gruiformes	10.3	10	21.45	12	11.15	0.52	305	Piratelli AJ, Favoretto GR, de Almeida Maximiano MF. 2015. Factors affecting escape distance in birds. Zoologia. 32:438-444.
Garrulus.glandarius	Corvidae	Passeriformes	7.298	27	22.909	40	15.61	0.68	161.7	Díaz M, Møller AP, Flensted-Jensen E, Grim T, Ibáñez-Álamo JD, Jokimäki J, Markó G, Tryjanowski P. 2013. The geography of fear: A latitudinal gradient in anti-predator escape distances of birds across Europe. PLoS ONE. 8:e64634.
Grallina.cyanoleuca	Monarchidae	Passeriformes	12	>5	35	>5	23	0.66	90	Kitchen K, Lill A, Price M. 2010. Tolerance of human disturbance by urban magpie-larks. Australian Field Ornithology. 27:1-9.
Guira.guira	Cuculidae	Cuculiformes	4.35	10	14.25	32	9.9	0.69	146	Carrete M, Tella JL. 2011. Inter-individual variability in fear of humans and relative brain size of the species are related to contemporary urban invasion in birds. PLoS ONE. 6:e18859
Haematopus.ostralegus	Haematopodidae	charadriiformes	28	3	20.4007	15	-7.6	-0.37	531	Díaz M, Møller AP, Flensted-Jensen E, Grim T, Ibáñez-Álamo JD, Jokimäki J, Markó G, Tryjanowski P. 2013. The geography of fear: A latitudinal gradient in anti-predator escape distances of birds across Europe. PLoS ONE. 8:e64634.
Hippolais.icterina	Acrocephalidae	Passeriformes	7.69	4	7.76	17	0.07	0.01	13.3	Díaz M, Møller AP, Flensted-Jensen E, Grim T, Ibáñez-Álamo JD, Jokimäki J, Markó G, Tryjanowski P. 2013. The geography of fear: A latitudinal gradient in anti-predator escape distances of birds across Europe. PLoS ONE. 8:e64634.
Hirundo.rustica	Hirundinidae	Passeriformes	9.28125	16	10.4848	67	1.2	0.11	19.1	Díaz M, Møller AP, Flensted-Jensen E, Grim T, Ibáñez-Álamo JD, Jokimäki J, Markó G, Tryjanowski P. 2013. The geography of fear: A latitudinal gradient in anti-predator escape distances of birds across Europe. PLoS ONE. 8:e64634.
Junco.hyemalis	Emberizidae	Passeriformes	4.2	24	13.5	30	9.3	0.69	19.85	Atwell JW, Cardoso GC, Whittaker DJ, Campbell-Nelson S, Robertson KW, Ketterson ED. 2012. Boldness behavior and stress physiology in a novel urban environment suggest rapid correlated evolutionary adaptation. Behav Ecol. 23:960-969.
Larus.argentatus	Laridae	Charadriiformes	18.67	9	39.845	50	21.18	0.53	895	Díaz M, Møller AP, Flensted-Jensen E, Grim T, Ibáñez-Álamo JD, Jokimäki J, Markó G, Tryjanowski P. 2013. The geography of fear: A latitudinal gradient in anti-predator escape distances of birds across Europe. PLoS ONE. 8:e64634.
Larus.canus	Laridae	Charadriiformes	11	3	57.2376	51	46.24	0.81	386.5	Díaz M, Møller AP, Flensted-Jensen E, Grim T, Ibáñez-Álamo JD, Jokimäki J, Markó G, Tryjanowski P. 2013. The geography of fear: A latitudinal gradient in anti-predator escape distances of birds across Europe. PLoS ONE. 8:e64634.
Larus.graellsii	Laridae	Charadriiformes	7.5	2	27.8551	169	20.36	0.73	817.5	Díaz M, Møller AP, Flensted-Jensen E, Grim T, Ibáñez-Álamo JD, Jokimäki J, Markó G, Tryjanowski P. 2013. The geography of fear: A latitudinal gradient in anti-predator escape distances of birds across Europe. PLoS ONE. 8:e64634.
Larus.marinus	Laridae	Charadriiformes	23.652	15	57.52	42	33.87	0.59	1599.5	Díaz M, Møller AP, Flensted-Jensen E, Grim T, Ibáñez-Álamo JD, Jokimäki J, Markó G, Tryjanowski P. 2013. The geography of fear: A latitudinal gradient in anti-predator escape distances of birds across Europe. PLoS ONE. 8:e64634.
Linaria.cannabina	Fringillidae	Passeriformes	9.19	13	11.9682	77	2.78	0.23	19	Díaz M, Møller AP, Flensted-Jensen E, Grim T, Ibáñez-Álamo JD, Jokimäki J, Markó G, Tryjanowski P. 2013. The geography of fear: A latitudinal gradient in anti-predator escape distances of birds across Europe. PLoS ONE. 8:e64634.
Lophophanes.cristatus	Paridae	Passeriformes	6.04	6	6.68786	14	0.65	0.1	11.2	Díaz M, Møller AP, Flensted-Jensen E, Grim T, Ibáñez-Álamo JD, Jokimäki J, Markó G, Tryjanowski P. 2013. The geography of fear: A latitudinal gradient in anti-predator escape distances of birds across Europe. PLoS ONE. 8:e64634.
Loxigilla.barbadensis	Thraupidae	Passeriformes	4.02204	>5	6.88705	>5	2.87	0.42	15.65	Ducatez S, Audet JN, Rodriguez JR, Kayello L, Lefebvre L. 2017. Innovativeness and the effects of urbanization on risk-taking behaviors in wild Barbados birds. Anim Cogn. 20:33-42.
Machetornis.rixosa	Tyrannidae	Passeriformes	4.96	35	5.58	33	0.62	0.11	29.6	Piratelli AJ, Favoretto GR, de Almeida Maximiano MF. 2015. Factors affecting escape distance in birds. Zoologia. 32:438-444.
Melospiza.melodia	Emberizidae	Passeriformes	4.8	12	13.9	12	9.1	0.65	32.45	Evans J, Boudreau K, Hyman J. 2010. Behavioural syndromes in urban and rural populations of song sparrows. Ethology. 116:588-595.
Mimus.saturninus	Mimidae	Passeriformes	4.03	44	15.54	38	11.51	0.74	73	Carrete M, Tella JL. 2011. Inter-individual variability in fear of humans and relative brain size of the species are related to contemporary urban invasion in birds. PLoS ONE. 6:e18859
Molothrus.bonariensis	Icteridae	Passeriformes	4.8	38	11.34	28	6.54	0.58	52	Carrete M, Tella JL. 2011. Inter-individual variability in fear of humans and relative brain size of the species are related to contemporary urban invasion in birds. PLoS ONE. 6:e18859
Motacilla.alba	Motacillidae	Passeriformes	7.725	190	14.0539	171	6.33	0.45	20.8	Díaz M, Møller AP, Flensted-Jensen E, Grim T, Ibáñez-Álamo JD, Jokimäki J, Markó G, Tryjanowski P. 2013. The geography of fear: A latitudinal gradient in anti-predator escape distances of birds across Europe. PLoS ONE. 8:e64634.
Motacilla.cinerea	Motacillidae	Passeriformes	7.84	22	7.972	15	0.13	0.02	17.4	Díaz M, Møller AP, Flensted-Jensen E, Grim T, Ibáñez-Álamo JD, Jokimäki J, Markó G, Tryjanowski P. 2013. The geography of fear: A latitudinal gradient in anti-predator escape distances of birds across Europe. PLoS ONE. 8:e64634.
Muscicapa.striata	Muscicapidae	Passeriformes	9.65	41	13.1463	19	3.5	0.27	15.5	Díaz M, Møller AP, Flensted-Jensen E, Grim T, Ibáñez-Álamo JD, Jokimäki J, Markó G, Tryjanowski P. 2013. The geography of fear: A latitudinal gradient in anti-predator escape distances of birds across Europe. PLoS ONE. 8:e64634.
Myiopsitta.monachus	Psittacidae	Psittaciformes	11.5	6	20.61	33	9.11	0.44	101	Carrete M, Tella JL. 2011. Inter-individual variability in fear of humans and relative brain size of the species are related to contemporary urban invasion in birds. PLoS ONE. 6:e18859
Parus.major	Paridae	Passeriformes	5.09903	259	8.59319	260	3.49	0.41	18.5	Díaz M, Møller AP, Flensted-Jensen E, Grim T, Ibáñez-Álamo JD, Jokimäki J, Markó G, Tryjanowski P. 2013. The geography of fear: A latitudinal gradient in anti-predator escape distances of birds across Europe. PLoS ONE. 8:e64634.
Passer.domesticus	Passeridae	Passeriformes	7.66515	711	30.7101	352	23.04	0.75	30.4	Díaz M, Møller AP, Flensted-Jensen E, Grim T, Ibáñez-Álamo JD, Jokimäki J, Markó G, Tryjanowski P. 2013. The geography of fear: A latitudinal gradient in anti-predator escape distances of birds across Europe. PLoS ONE. 8:e64634.
Passer.montanus	Passeridae	Passeriformes	5.78517	176	13.867	150	8.08	0.58	21.7	Díaz M, Møller AP, Flensted-Jensen E, Grim T, Ibáñez-Álamo JD, Jokimäki J, Markó G, Tryjanowski P. 2013. The geography of fear: A latitudinal gradient in anti-predator escape distances of birds across Europe. PLoS ONE. 8:e64634.
Patagioenas.maculosa	Columbidae	Columbiformes	3.6	40	20.47	19	16.87	0.82	347	Carrete M, Tella JL. 2011. Inter-individual variability in fear of humans and relative brain size of the species are related to contemporary urban invasion in birds. PLoS ONE. 6:e18859
Patagioenas.picazuro	Columbidae	Columbiformes	6.53	39	27.47	38	20.94	0.76	402	Carrete M, Tella JL. 2011. Inter-individual variability in fear of humans and relative brain size of the species are related to contemporary urban invasion in birds. PLoS ONE. 6:e18859
Patagioenas.squamosa	Columbidae	Columbiformes	8.42975		15.978		7.55	0.47	305	Ducatez S, Audet JN, Rodriguez JR, Kayello L, Lefebvre L. 2017. Innovativeness and the effects of urbanization on risk-taking behaviors in wild Barbados birds. Anim Cogn. 20:33-42.
Periparus.ater	Paridae	Passeriformes	5.445	11	8.68067	15	3.24	0.37	9.3	Díaz M, Møller AP, Flensted-Jensen E, Grim T, Ibáñez-Álamo JD, Jokimäki J, Markó G, Tryjanowski P. 2013. The geography of fear: A latitudinal gradient in anti-predator escape distances of birds across Europe. PLoS ONE. 8:e64634.
Phalacrocorax.carbo	Phalacrocoracidae	Pelecaniformes	7	2	64.5029	14	57.5	0.89	2254	Díaz M, Møller AP, Flensted-Jensen E, Grim T, Ibáñez-Álamo JD, Jokimäki J, Markó G, Tryjanowski P. 2013. The geography of fear: A latitudinal gradient in anti-predator escape distances of birds across Europe. PLoS ONE. 8:e64634.
Phalcoboenus.chimango	Falconidae	Falconiformes	3.31	78	20.78	107	17.47	0.84	296	Carrete M, Tella JL. 2011. Inter-individual variability in fear of humans and relative brain size of the species are related to contemporary urban invasion in birds. PLoS ONE. 6:e18859
Phoenicurus.ochruros	Muscicapidae	Passeriformes	7.0631	58	16.0676	58	9	0.56	16	Díaz M, Møller AP, Flensted-Jensen E, Grim T, Ibáñez-Álamo JD, Jokimäki J, Markó G, Tryjanowski P. 2013. The geography of fear: A latitudinal gradient in anti-predator escape distances of birds across Europe. PLoS ONE. 8:e64634.
Phoenicurus.phoenicurus	Muscicapidae	Passeriformes	7.99067	15	14.0558	12	6.07	0.43	15.9	Díaz M, Møller AP, Flensted-Jensen E, Grim T, Ibáñez-Álamo JD, Jokimäki J, Markó G, Tryjanowski P. 2013. The geography of fear: A latitudinal gradient in anti-predator escape distances of birds across Europe. PLoS ONE. 8:e64634.
Phylloscopus.collybita	Phylloscopidae	Passeriformes	5.4915	20	7.91367	30	2.42	0.31	7.7	Díaz M, Møller AP, Flensted-Jensen E, Grim T, Ibáñez-Álamo JD, Jokimäki J, Markó G, Tryjanowski P. 2013. The geography of fear: A latitudinal gradient in anti-predator escape distances of birds across Europe. PLoS ONE. 8:e64634.
Phylloscopus.trochilus	Phylloscopidae	Passeriformes	6.11	6	5.98847	85	-0.12	-0.02	9.4	Díaz M, Møller AP, Flensted-Jensen E, Grim T, Ibáñez-Álamo JD, Jokimäki J, Markó G, Tryjanowski P. 2013. The geography of fear: A latitudinal gradient in anti-predator escape distances of birds across Europe. PLoS ONE. 8:e64634.
Pica.pica	Corvidae	Passeriformes	10.9588	280	38.8623	271	27.9	0.72	228	Díaz M, Møller AP, Flensted-Jensen E, Grim T, Ibáñez-Álamo JD, Jokimäki J, Markó G, Tryjanowski P. 2013. The geography of fear: A latitudinal gradient in anti-predator escape distances of birds across Europe. PLoS ONE. 8:e64634.
Picus.viridis	Picidae	Piciformes	15.4769	13	18.8348	21	3.36	0.18	193.5	Díaz M, Møller AP, Flensted-Jensen E, Grim T, Ibáñez-Álamo JD, Jokimäki J, Markó G, Tryjanowski P. 2013. The geography of fear: A latitudinal gradient in anti-predator escape distances of birds across Europe. PLoS ONE. 8:e64634.
Pitangus.sulphuratus	Tyrannidae	Passeriformes	9.47	19	20.33	9	10.86	0.53	61	Carrete M, Tella JL. 2011. Inter-individual variability in fear of humans and relative brain size of the species are related to contemporary urban invasion in birds. PLoS ONE. 6:e18859
Poecile.palustris	Paridae	Passeriformes	6.1	6	5.33111	18	-0.77	-0.14	11.9	Díaz M, Møller AP, Flensted-Jensen E, Grim T, Ibáñez-Álamo JD, Jokimäki J, Markó G, Tryjanowski P. 2013. The geography of fear: A latitudinal gradient in anti-predator escape distances of birds across Europe. PLoS ONE. 8:e64634.
Polyborus.plancus	Falconidae	Falconiformes	20	2	41.6	48	21.6	0.52	893	Carrete M, Tella JL. 2011. Inter-individual variability in fear of humans and relative brain size of the species are related to contemporary urban invasion in birds. PLoS ONE. 6:e18859
Progne.elegans	Hirundinidae	Passeriformes	3.5	2	10	2	6.5	0.65	49	Carrete M, Tella JL. 2011. Inter-individual variability in fear of humans and relative brain size of the species are related to contemporary urban invasion in birds. PLoS ONE. 6:e18859
Progne.tapera	Hirundinidae	Passeriformes	3.23	11	7.67	3	4.44	0.58	36	Carrete M, Tella JL. 2011. Inter-individual variability in fear of humans and relative brain size of the species are related to contemporary urban invasion in birds. PLoS ONE. 6:e18859
Prunella.modularis	Prunellidae	Passeriformes	4.11	30	6.86943	35	2.76	0.4	19	Díaz M, Møller AP, Flensted-Jensen E, Grim T, Ibáñez-Álamo JD, Jokimäki J, Markó G, Tryjanowski P. 2013. The geography of fear: A latitudinal gradient in anti-predator escape distances of birds across Europe. PLoS ONE. 8:e64634.
Pyrocephalus.rubinus	Tyrannidae	Passeriformes	8.96	12	22.22	31	13.26	0.6	14	Carrete M, Tella JL. 2011. Inter-individual variability in fear of humans and relative brain size of the species are related to contemporary urban invasion in birds. PLoS ONE. 6:e18859
Pyrrhula.pyrrhula	Fringillidae	Passeriformes	4.775	8	8.44545	11	3.67	0.43	31.1	Díaz M, Møller AP, Flensted-Jensen E, Grim T, Ibáñez-Álamo JD, Jokimäki J, Markó G, Tryjanowski P. 2013. The geography of fear: A latitudinal gradient in anti-predator escape distances of birds across Europe. PLoS ONE. 8:e64634.
Quiscalus.lugubris	Icteridae	Passeriformes	6.66667	>5	9.14601	>5	2.48	0.27	63.25	Ducatez S, Audet JN, Rodriguez JR, Kayello L, Lefebvre L. 2017. Innovativeness and the effects of urbanization on risk-taking behaviors in wild Barbados birds. Anim Cogn. 20:33-42.
Regulus.regulus	Regulidae	Passeriformes	3.306	28	4.93364	11	1.63	0.33	5.8	Díaz M, Møller AP, Flensted-Jensen E, Grim T, Ibáñez-Álamo JD, Jokimäki J, Markó G, Tryjanowski P. 2013. The geography of fear: A latitudinal gradient in anti-predator escape distances of birds across Europe. PLoS ONE. 8:e64634.
Rhipidura.leucophrys	Rhipiduridae	Passeriformes	8.73	20	23.49	21	14.76	0.63	20.5	Price M. 2003. Tolerance of a human observer by four ground-foraging bird species in urban and rural areas. Thesis
Rupornis.magnirostris	Accipitridae	Accipitriformes	10.08	6	19.43	7	9.35	0.48	269	Carrete M, Tella JL. 2011. Inter-individual variability in fear of humans and relative brain size of the species are related to contemporary urban invasion in birds. PLoS ONE. 6:e18859
Serinus.serinus	Fringillidae	Passeriformes	7.44437	119	23.4458	196	16	0.68	12	Díaz M, Møller AP, Flensted-Jensen E, Grim T, Ibáñez-Álamo JD, Jokimäki J, Markó G, Tryjanowski P. 2013. The geography of fear: A latitudinal gradient in anti-predator escape distances of birds across Europe. PLoS ONE. 8:e64634.
Sicalis.flaveola	Thraupidae	Passeriformes	2.33	3	9.8	10	7.47	0.76	17	Carrete M, Tella JL. 2011. Inter-individual variability in fear of humans and relative brain size of the species are related to contemporary urban invasion in birds. PLoS ONE. 6:e18859
Sicalis.luteola	Thraupidae	Passeriformes	4.58	6	14	7	9.42	0.67	10	Carrete M, Tella JL. 2011. Inter-individual variability in fear of humans and relative brain size of the species are related to contemporary urban invasion in birds. PLoS ONE. 6:e18859
Sitta.europaea	Sittidae	Passeriformes	5.91344	32	8.53083	12	2.62	0.31	23.9	Díaz M, Møller AP, Flensted-Jensen E, Grim T, Ibáñez-Álamo JD, Jokimäki J, Markó G, Tryjanowski P. 2013. The geography of fear: A latitudinal gradient in anti-predator escape distances of birds across Europe. PLoS ONE. 8:e64634.
Spinus.magellanica	Fringillidae	Passeriformes	3.75	14	16.09	11	12.34	0.77	11	Carrete M, Tella JL. 2011. Inter-individual variability in fear of humans and relative brain size of the species are related to contemporary urban invasion in birds. PLoS ONE. 6:e18859
Streptopelia.decaocto	Columbidae	Columbiformes	7.85843	108	17.0864	69	9.23	0.54	201.5	Díaz M, Møller AP, Flensted-Jensen E, Grim T, Ibáñez-Álamo JD, Jokimäki J, Markó G, Tryjanowski P. 2013. The geography of fear: A latitudinal gradient in anti-predator escape distances of birds across Europe. PLoS ONE. 8:e64634.
Sturnus.unicolor	Sturnidae	Passeriformes	20.49	46	49.399	71	28.91	0.59	90.6	Díaz M, Møller AP, Flensted-Jensen E, Grim T, Ibáñez-Álamo JD, Jokimäki J, Markó G, Tryjanowski P. 2013. The geography of fear: A latitudinal gradient in anti-predator escape distances of birds across Europe. PLoS ONE. 8:e64634.
Sturnus.vulgaris	Sturnidae	Passeriformes	7.7199	101	16.0759	117	8.36	0.52	80.5	Díaz M, Møller AP, Flensted-Jensen E, Grim T, Ibáñez-Álamo JD, Jokimäki J, Markó G, Tryjanowski P. 2013. The geography of fear: A latitudinal gradient in anti-predator escape distances of birds across Europe. PLoS ONE. 8:e64634.
Sylvia.atricapilla	Sylviidae	Passeriformes	6.57328	64	11.1715	60	4.6	0.41	18.9	Díaz M, Møller AP, Flensted-Jensen E, Grim T, Ibáñez-Álamo JD, Jokimäki J, Markó G, Tryjanowski P. 2013. The geography of fear: A latitudinal gradient in anti-predator escape distances of birds across Europe. PLoS ONE. 8:e64634.
Sylvia.borin	Sylviidae	Passeriformes	6.55	4	7.07333	42	0.52	0.07	19.1	Díaz M, Møller AP, Flensted-Jensen E, Grim T, Ibáñez-Álamo JD, Jokimäki J, Markó G, Tryjanowski P. 2013. The geography of fear: A latitudinal gradient in anti-predator escape distances of birds across Europe. PLoS ONE. 8:e64634.
Sylvia.cantillans	Sylviidae	Passeriformes	10.76	3	5.22	2	-5.54	-1.06	8.1	Díaz M, Møller AP, Flensted-Jensen E, Grim T, Ibáñez-Álamo JD, Jokimäki J, Markó G, Tryjanowski P. 2013. The geography of fear: A latitudinal gradient in anti-predator escape distances of birds across Europe. PLoS ONE. 8:e64634.
Sylvia.communis	Sylviidae	Passeriformes	4.78	4	8.46952	145	3.69	0.44	14.5	Díaz M, Møller AP, Flensted-Jensen E, Grim T, Ibáñez-Álamo JD, Jokimäki J, Markó G, Tryjanowski P. 2013. The geography of fear: A latitudinal gradient in anti-predator escape distances of birds across Europe. PLoS ONE. 8:e64634.
Sylvia.curruca	Sylviidae	Passeriformes	4.48818	11	6.43437	32	1.95	0.3	12.4	Díaz M, Møller AP, Flensted-Jensen E, Grim T, Ibáñez-Álamo JD, Jokimäki J, Markó G, Tryjanowski P. 2013. The geography of fear: A latitudinal gradient in anti-predator escape distances of birds across Europe. PLoS ONE. 8:e64634.
Sylvia.melanocephala	Sylviidae	Passeriformes	7.86667	9	21.2249	100	13.36	0.63	13.5	Díaz M, Møller AP, Flensted-Jensen E, Grim T, Ibáñez-Álamo JD, Jokimäki J, Markó G, Tryjanowski P. 2013. The geography of fear: A latitudinal gradient in anti-predator escape distances of birds across Europe. PLoS ONE. 8:e64634.
Tiaris.bicolor	Thraupidae	Passeriformes	6.88705	>5	9.53168	>5	2.64	0.28	10.5	Ducatez S, Audet JN, Rodriguez JR, Kayello L, Lefebvre L. 2017. Innovativeness and the effects of urbanization on risk-taking behaviors in wild Barbados birds. Anim Cogn. 20:33-42.
Troglodytes.troglodytes	Troglodytidae	Passeriformes	4.45615	39	6.39361	36	1.94	0.3	8.9	Díaz M, Møller AP, Flensted-Jensen E, Grim T, Ibáñez-Álamo JD, Jokimäki J, Markó G, Tryjanowski P. 2013. The geography of fear: A latitudinal gradient in anti-predator escape distances of birds across Europe. PLoS ONE. 8:e64634.
Turdus.iliacus	Turdidae	Passeriformes	9.12889	9	12.8293	14	3.7	0.29	62.9	Díaz M, Møller AP, Flensted-Jensen E, Grim T, Ibáñez-Álamo JD, Jokimäki J, Markó G, Tryjanowski P. 2013. The geography of fear: A latitudinal gradient in anti-predator escape distances of birds across Europe. PLoS ONE. 8:e64634.
Turdus.merula	Turdidae	Passeriformes	6.15636	1049	15.6671	425	9.51	0.61	95.9	Díaz M, Møller AP, Flensted-Jensen E, Grim T, Ibáñez-Álamo JD, Jokimäki J, Markó G, Tryjanowski P. 2013. The geography of fear: A latitudinal gradient in anti-predator escape distances of birds across Europe. PLoS ONE. 8:e64634.
Turdus.philomelos	Turdidae	Passeriformes	4.41487	117	13.809	69	9.39	0.68	70.5	Díaz M, Møller AP, Flensted-Jensen E, Grim T, Ibáñez-Álamo JD, Jokimäki J, Markó G, Tryjanowski P. 2013. The geography of fear: A latitudinal gradient in anti-predator escape distances of birds across Europe. PLoS ONE. 8:e64634.
Turdus.pilaris	Turdidae	Passeriformes	9.31683	180	18.3436	67	9.03	0.49	92.1	Díaz M, Møller AP, Flensted-Jensen E, Grim T, Ibáñez-Álamo JD, Jokimäki J, Markó G, Tryjanowski P. 2013. The geography of fear: A latitudinal gradient in anti-predator escape distances of birds across Europe. PLoS ONE. 8:e64634.
Turdus.viscivorus	Turdidae	Passeriformes	11.14	3	30.1108	13	18.97	0.63	117.8	Díaz M, Møller AP, Flensted-Jensen E, Grim T, Ibáñez-Álamo JD, Jokimäki J, Markó G, Tryjanowski P. 2013. The geography of fear: A latitudinal gradient in anti-predator escape distances of birds across Europe. PLoS ONE. 8:e64634.
Tyrannus.dominicensis	Tyrannidae	Passeriformes	9.14601		13.6639		4.52	0.33	45.5	Ducatez S, Audet JN, Rodriguez JR, Kayello L, Lefebvre L. 2017. Innovativeness and the effects of urbanization on risk-taking behaviors in wild Barbados birds. Anim Cogn. 20:33-42.
Tyrannus.melancholicus	Tyrannidae	Passeriformes	6.39	9	12.09	23	5.7	0.47	38	Carrete M, Tella JL. 2011. Inter-individual variability in fear of humans and relative brain size of the species are related to contemporary urban invasion in birds. PLoS ONE. 6:e18859
Tyrannus.savana	Tyrannidae	Passeriformes	4.69	18	11.18	65	6.49	0.58	29	Carrete M, Tella JL. 2011. Inter-individual variability in fear of humans and relative brain size of the species are related to contemporary urban invasion in birds. PLoS ONE. 6:e18859
Upupa.epops	Upupidae	Bucerotiformes	20.25	2	54.09	30	33.84	0.63	67.1	Díaz M, Møller AP, Flensted-Jensen E, Grim T, Ibáñez-Álamo JD, Jokimäki J, Markó G, Tryjanowski P. 2013. The geography of fear: A latitudinal gradient in anti-predator escape distances of birds across Europe. PLoS ONE. 8:e64634.
Vanellus.chilensis	Charadriidae	charadriiformes	5.78	18	27.03	63	21.25	0.79	327	Carrete M, Tella JL. 2011. Inter-individual variability in fear of humans and relative brain size of the species are related to contemporary urban invasion in birds. PLoS ONE. 6:e18859
Xolmis.irupero	Tyrannidae	Passeriformes	9.31	13	23.06	17	13.75	0.6	30	Carrete M, Tella JL. 2011. Inter-individual variability in fear of humans and relative brain size of the species are related to contemporary urban invasion in birds. PLoS ONE. 6:e18859
Zenaida.auriculata	Columbidae	Columbiformes	2.31	40	19.76	71	17.45	0.88	114	Carrete M, Tella JL. 2011. Inter-individual variability in fear of humans and relative brain size of the species are related to contemporary urban invasion in birds. PLoS ONE. 6:e18859
Zenaida.aurita	Columbidae	Columbiformes	4.73829	>5	16.4187	>5	11.68	0.71	144.75	Ducatez S, Audet JN, Rodriguez JR, Kayello L, Lefebvre L. 2017. Innovativeness and the effects of urbanization on risk-taking behaviors in wild Barbados birds. Anim Cogn. 20:33-42.
Zonotrichia.capensis	Emberizidae	Passeriformes	4.09	16	10.58	32	6.49	0.61	21	Carrete M, Tella JL. 2011. Inter-individual variability in fear of humans and relative brain size of the species are related to contemporary urban invasion in birds. PLoS ONE. 6:e18859
